# Supplementary material for: Neuroinflammation in post-acute sequelae of COVID-19 (PASC) as assessed by [11C]PBR28 PET correlates with vascular disease measures
Source: PubMed Central journal article supplement — Brain Behav Immun. Author manuscript; Available in PMC 2024 Jul 5. (PMC11225883; doi:10.1016/j.bbi.2024.04.015), 2024-04-18
Supplement: NIHMS1993045-supplement-MMC1.pdf [file NIHMS1993045-supplement-MMC1.pdf]

# SUPPLEMENTAL DATA

Supplemental Figure 1

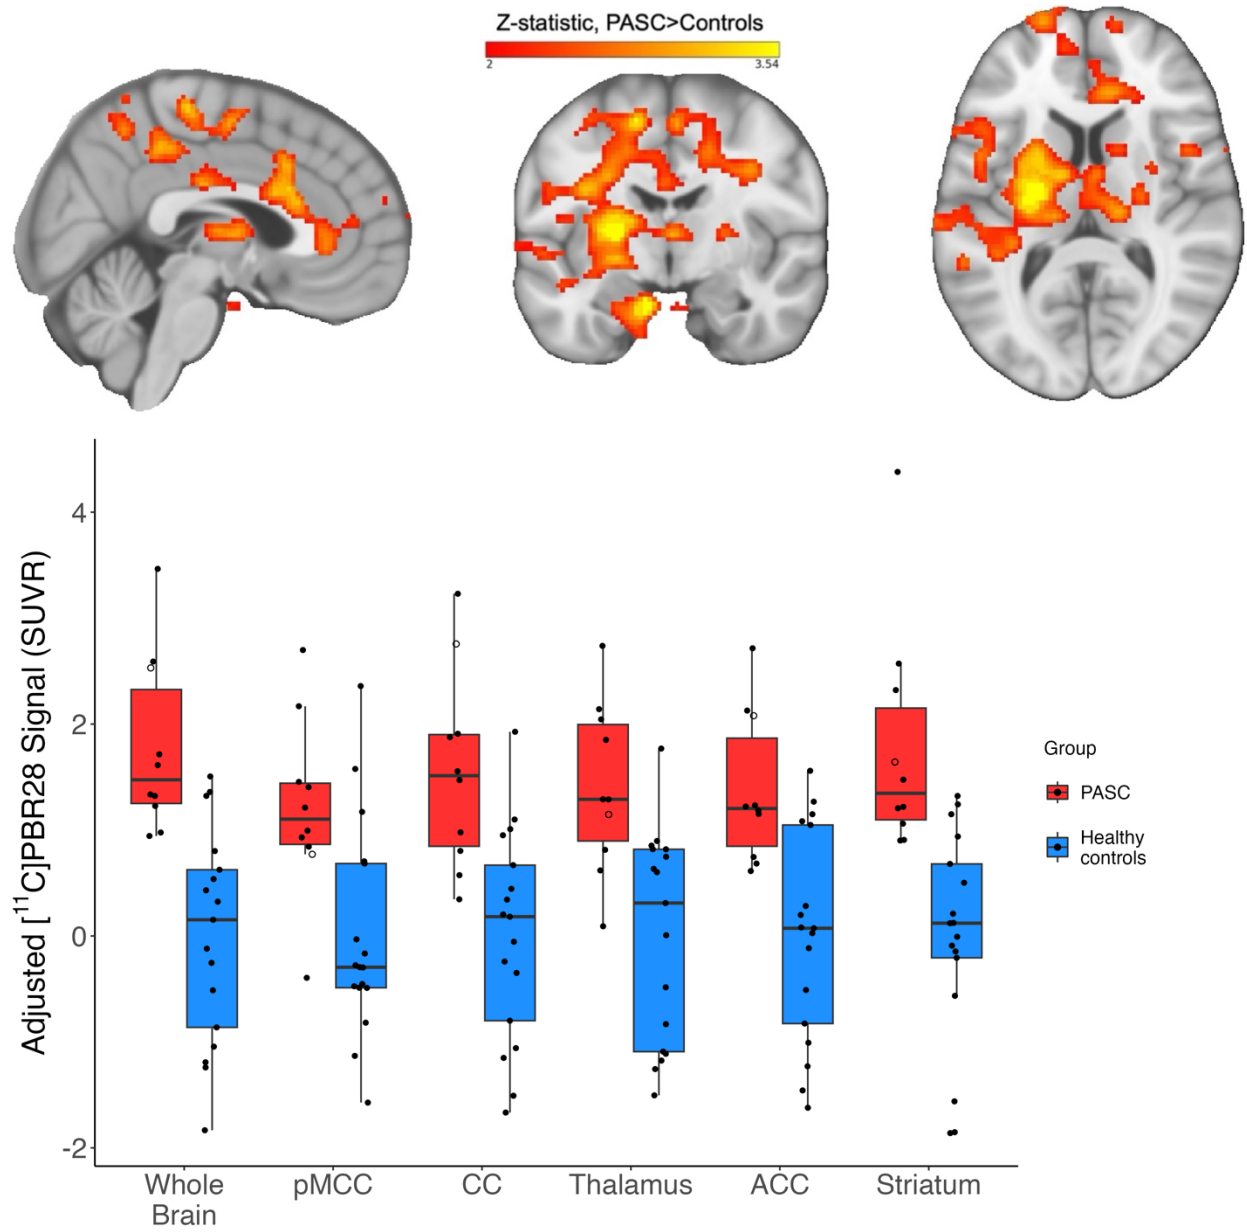

Supplemental Figure 1 legend:

While we statistically controlled for sex in our primary analysis (Figure 1), there was a higher proportion of females in the PASC group than the controls. Therefore, as an additional validation analysis, we performed a female-only unpaired between-groups analysis (PASC n=10, control n=17), conducted in the same way as Figure 1. In the female-only analysis, the average injected radioligand dose did not differ between PASC cases (mean 13.97 mCi, SD 1.33) and controls (13.04, 1.74),  $t(25)=1.46$ ,  $p=.16$ , and age did not differ between PASC cases (mean 48.80 years, SD 14.34) and controls (48.53, 13.43),  $t(25)=0.05$ ,  $p=.96$ . While it is standard practice to statistically control for TSPO genotype in [ $^{11}\text{C}$ ]PBR28 studies, the genotype distribution did not statistically differ between female PASC cases (GA=6, GG=4) and female controls (GA=5, GG=12), Chi-square=2.44,  $p=.12$ . BMI was higher in PASC cases (27.03, 5.36) than in controls (23.13, 3.09),  $t(25)=2.41$ ,  $p=.02$ . Therefore, we statistically controlled for both genotype and BMI in this analysis. In the PASC group bar graph, cases that were hospitalized during their acute COVID-19 illness are represented by open circles.

Supplemental Figure 2

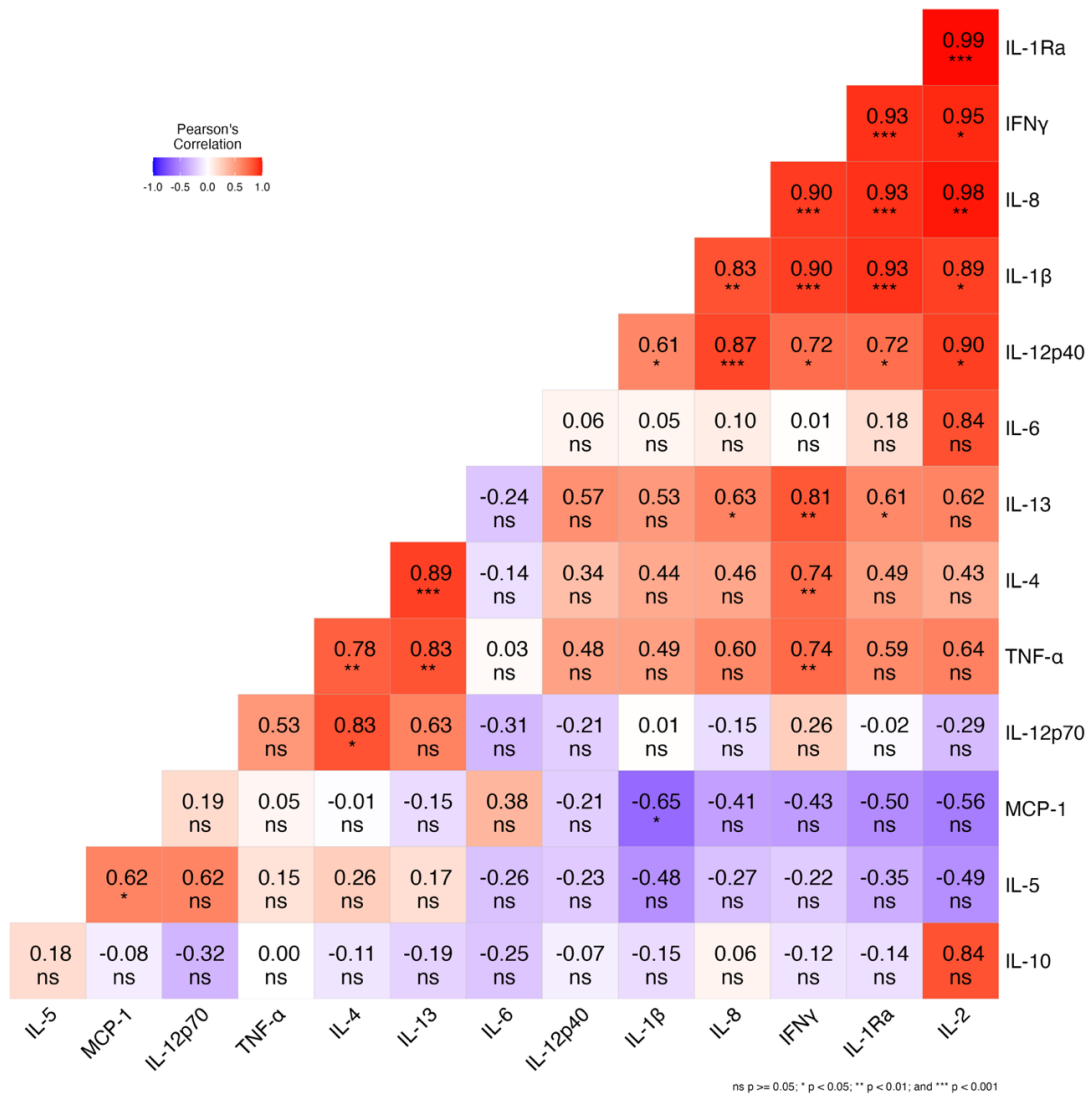

Supplemental Figure 2 legend:

Correlation matrix showing relationships among cytokines from a 15 cytokine multiplex (Millipore HCYTA-60K Luminex magnetic bead panel performed by Eve Technologies, Calgary Canada), from the 11 PASC participants that provided platelet-poor plasma samples immediately before PET neuroimaging.

Analytes included: GM-CSF, IFN $\gamma$ , IL-1 $\beta$ , IL-1RA, IL-2, IL-4, IL-5, IL-6, IL-8, IL-10, IL-12(p40), IL-12(p70), IL-13, MCP-1, TNF $\alpha$ . \* =  $p < .05$ ; \*\* =  $p < .01$ ; \*\*\* =  $p < .001$

Supplemental Figure 3

| <b>PASC participant</b> | <b>1</b> | <b>2</b> | <b>3</b> | <b>4</b> | <b>5</b> | <b>6</b> | <b>7</b> | <b>8</b> | <b>9</b> | <b>10</b> | <b>11</b> | <b>12</b> |
|-------------------------|----------|----------|----------|----------|----------|----------|----------|----------|----------|-----------|-----------|-----------|
| Headache                | 9        | 8        | 0        | 2        | 0        | 7        | 10       | 6        | 0        | 9         | 6         | 2         |
| Unrested                | 10       | 8        | 4        | 6        | 1        | 0        | 10       | 9        | 7        | 5         | 10        | 7         |
| Muscle } Pain           | 10       | 3        | 0        | 2        | 6        | 6        | 10       | 6        | 5        | 1         | 3         | 2         |
| Joint }                 |          |          |          |          |          |          |          |          |          |           |           |           |
| Short Term Memory       | 7        | 6        | 6        | 4        | 4        | 0        | 10       | 0        | 2        | 6         | 2         | 7         |
| Processing Information  | 9        | 6        | 6        | 6        | 4        | 0        | 10       | 3        | 3        | 6         | 3         | 5         |

Supplemental Figure 3 legend:

Each of the 12 PASC participants rated symptoms from the ICC “Neurological impairments” cluster on a 1-10 severity scale and marked their onset. For Pain, the ICC asked about “Significant pain” but the history questionnaire distinguished between muscle and joint pain.

Light green = Not reported as a problem

Orange = “This was a problem for me before COVID”

Pink = “This is a problem for me since I had COVID”

Red = “This is a serious problem for me since I had COVID”

Supplemental Table 1

| <b>Affective items</b>         | PASC mean (SD)     | Control mean (SD)   |
|--------------------------------|--------------------|---------------------|
| Sadness                        | 0.58 (0.67)        | 0.095 (0.48)        |
| Pessimism                      | 0.67 (0.49)        | 0.024 (0.15)        |
| Sense of failure               | 0.00 (0.00)        | 0.024 (0.15)        |
| Dissatisfaction                | 0.67 (0.65)        | 0.095 (0.30)        |
| Guilt                          | 0.17 (0.39)        | 0.023 (0.15)        |
| Feeling of punishment          | 0.00 (0.00)        | 0.048 (0.22)        |
| Disappointment in self         | 0.17 (0.39)        | 0.024 (0.16)        |
| Self-criticism                 | 0.58 (0.51)        | 0.048 (0.22)        |
| Suicidal thoughts              | 0.083 (0.29)       | 0.00 (0.00)         |
| Crying episodes                | 0.42 (0.90)        | 0.048 (0.22)        |
| Irritability                   | 0.42 (0.51)        | 0.24 (0.69)         |
| Social withdrawal              | 0.50 (0.52)        | 0.048 (0.22)        |
| Indecisiveness                 | 1.00 (0.74)        | 0.00 (0.00)         |
| <b>Average affective items</b> | <b>0.40 (0.23)</b> | <b>0.055 (0.10)</b> |
| <b>Somatic Items</b>           |                    |                     |
| Change of body image           | 0.42 (0.51)        | 0.024 (0.15)        |
| Ability to work                | 1.17 (0.94)        | 0.073 (0.26)        |
| Sleep difficulties             | 0.75 (0.45)        | 0.17 (0.44)         |
| Fatigability                   | 1.42 (0.79)        | 0.073 (0.26)        |

|                              |                     |                     |
|------------------------------|---------------------|---------------------|
| Loss of Appetite             | 0.58 (0.79)         | 0.024 (0.15)        |
| Weight loss                  | 0.083 (0.29)        | 0.048 (0.22)        |
| Health anxiety               | 1.08 (0.67)         | 0.00 (0.00)         |
| Loss of libido               | 0.83 (1.03)         | 0.071 (0.26)        |
| <b>Average somatic items</b> | <b>0.79 (0.39)</b>  | <b>0.060 (0.13)</b> |
| <b>Total score averages</b>  | <b>11.58 (1.74)</b> | <b>1.14 (5.58)</b>  |

Supplemental Table 1 legend:

PASC and Control participant means for BDI items within the affective and somatic subscales of the BDI. A mixed-model ANOVA revealed a significant interaction driven by high somatic item means within the PASC group.
